# Supplementary material for: Genetic loss of AMPK-glycogen binding destabilises AMPK and disrupts metabolism
Source: PubMed Central journal article supplement — Mol Metab. 2020 Jun 29;41:101048. doi: 10.1016/j.molmet.2020.101048 (PMC7393401; doi:10.1016/j.molmet.2020.101048), 2020-06-29
Supplement: mmc1.pdf [file mmc1.pdf]

SUPPLEMENTARY FIGURES

**A**

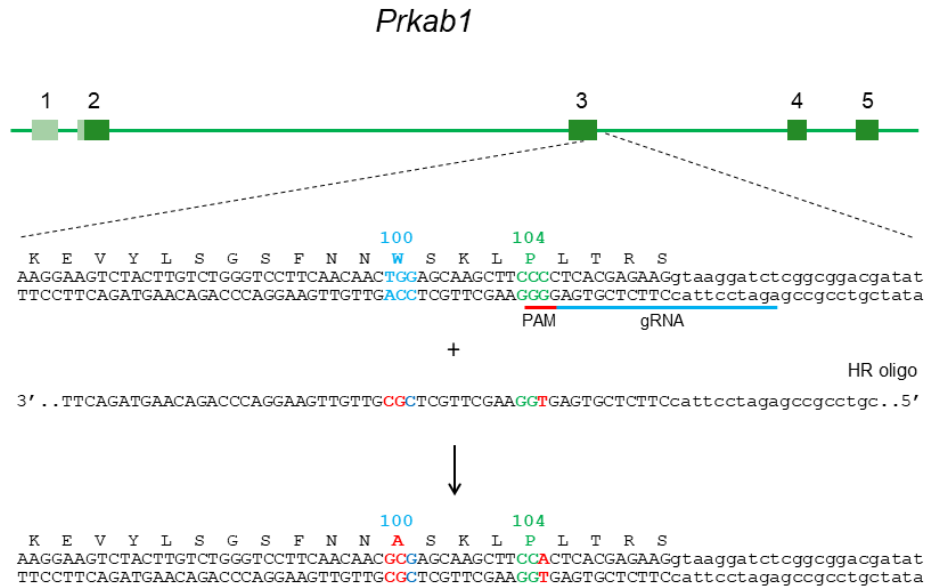

**B**

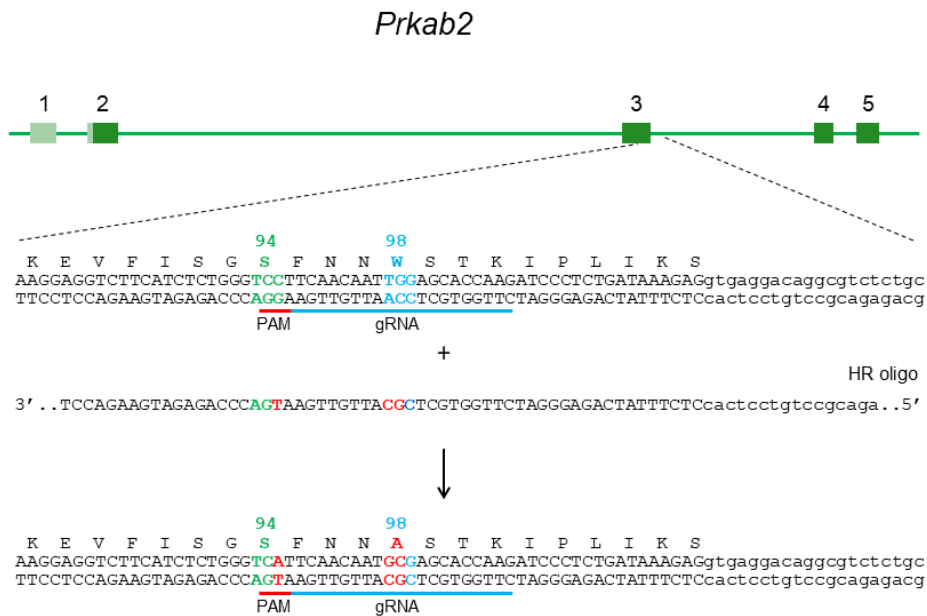

**Supplementary Figure S1. Related to Figure 1. Gene targeting strategy used to generate AMPK  $\beta$ 1 W100A and  $\beta$ 2 W98A whole-body KI mice.**

*Prkab1*<sup>W100A</sup> ( $\beta$ 1 W100A KI) and *Prkab2*<sup>W98A</sup> ( $\beta$ 2 W98A KI) mice were produced using CRISPR/Cas9 gene targeting in C57BL/6J mouse embryos following established molecular and animal husbandry techniques. Single guide RNAs (sgRNA) were based on target sites in exon 3 of *Prkab1* (AGATCCTTACCTTCTCGTGAGGG) and *Prkab2* (CTTGGTGCTCCAATTGTTGAAGG) (protospacer-associated motif [PAM] italicized and underlined). (A) For *Prkab1*, the oligonucleotide encoded the W100A (TGG>GCG) substitution plus a PAM-inactivating silent mutation in the P104 codon (CCC>CCA), while (B) for *Prkab2*, the oligonucleotide encoded the W98A (TGG>GCG) substitution plus a PAM-inactivating silent mutation in the S94 codon (TCC>TCA).

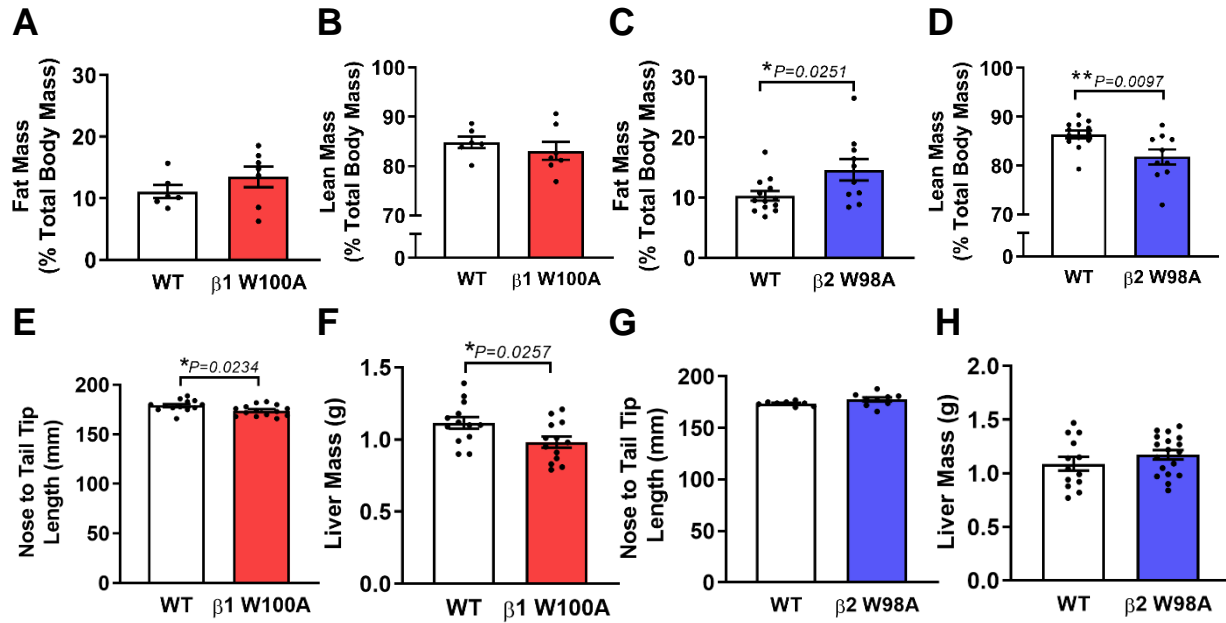

**Supplementary Figure S2. Related to Figure 2. Disrupting AMPK  $\beta 2$  glycogen binding increases whole-body adiposity.**

Male age-matched mice (8-15 wk) were subjected to EchoMRI analyses. (A) Fat and (B) lean mass for WT and  $\beta 1$  W100A (n=6-7), or  $\beta 2$  W98A (C) fat and (D) lean mass (n=10-13) are shown relative to total body mass. (E) Nose to tail tip length and (F) absolute liver mass for WT and  $\beta 1$  W100A (n=13-14; 14-22 wk), and WT and  $\beta 2$  W98A (G) nose to tail tip length and (H) absolute liver mass (n=8-18; 17-26 wk) are shown. Data are represented as mean  $\pm$  SEM;  $*P < 0.05$ ;  $**P < 0.01$ .

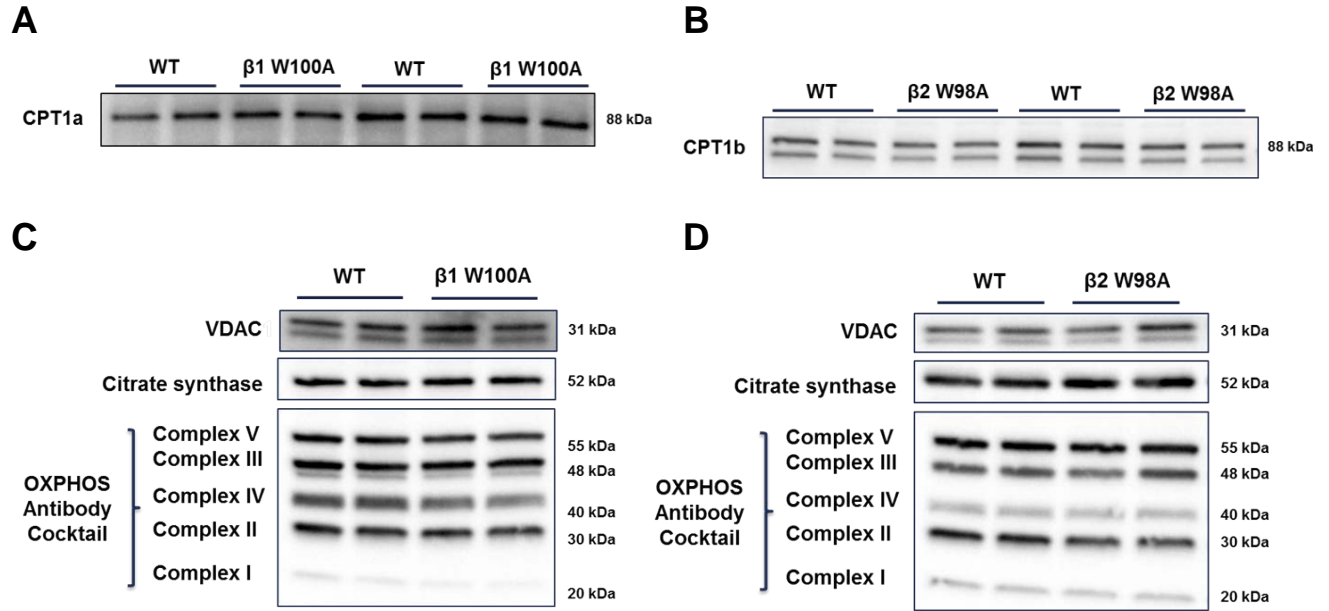

**Supplementary Figure S3. Related to Figure 3. Liver and skeletal muscle fatty acid transporter and mitochondrial content are not different between  $\beta 1$  W100A,  $\beta 2$  W98A and respective WT mice.**

Tissues were collected from male age-matched WT and KI mice (ranging from 14-32 wk). Representative immunoblots processed in parallel are shown for fatty acid transporters (**A**) CPT1a in WT and  $\beta 1$  W100A liver and (**B**) CPT1b in WT and  $\beta 2$  W98A gastrocnemius muscle. Representative immunoblots processed in parallel are shown for mitochondrial markers VDAC, citrate synthase and OXPHOS complexes (Complex I, II, III, IV and V) in respective WT and (**C**)  $\beta 1$  W100A liver or (**D**)  $\beta 2$  W98A gastrocnemius muscle. Equal protein loading was confirmed using Bio-Rad stain-free imaging technology.

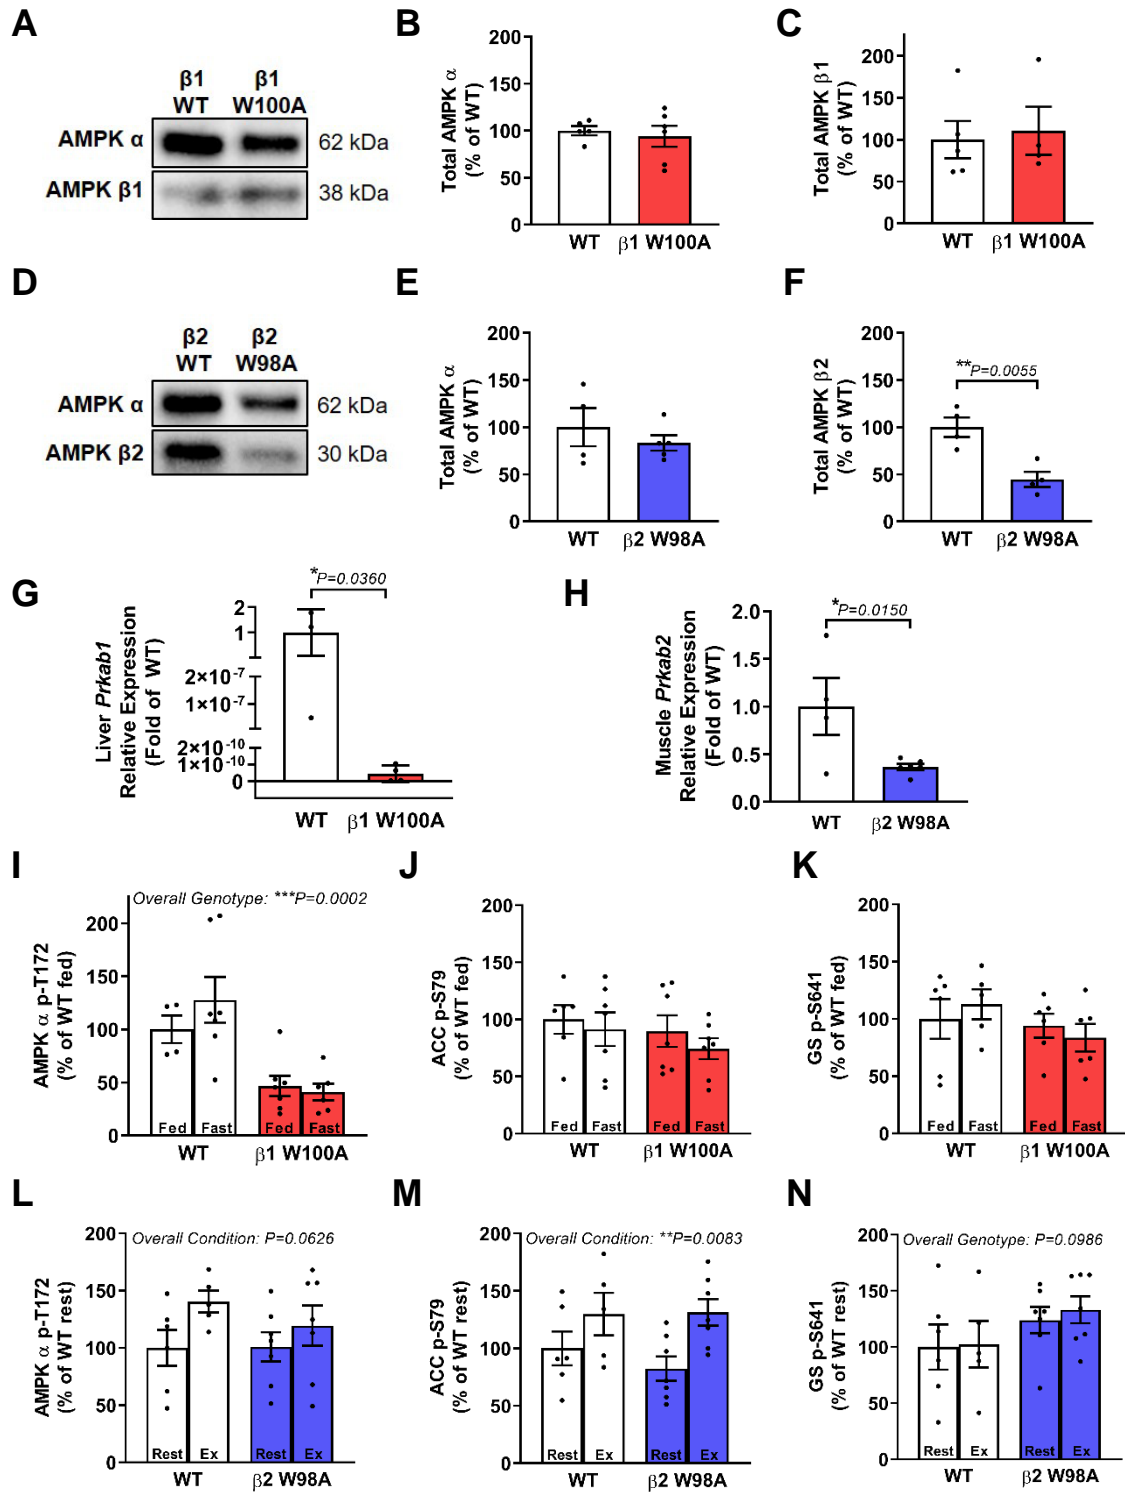

**Supplementary Figure S4. Related to Figure 4. Disrupting AMPK  $\beta 2$  glycogen binding decreases adipose tissue AMPK  $\beta 2$  protein, and AMPK  $\beta 1$  W100A liver and  $\beta 2$  W98A muscle display respective decreases in *Prkab1* and *Prkab2* gene expression versus WT.**

Tissues were collected from male age-matched WT and KI mice (ranging from 12-22 wk). Representative immunoblots processed in parallel are shown for respective WT versus (A)  $\beta$ 1 W100A adipose tissue or (D)  $\beta$ 2 W98A adipose tissue. Equal protein loading was confirmed using Bio-Rad stain-free imaging technology. Quantified immunoblots of adipose tissue total AMPK (B)  $\alpha$  and (C)  $\beta$  content from WT and  $\beta$ 1 W100A mice (n=4-6), and adipose tissue total AMPK (E)  $\alpha$  and (F)  $\beta$  content from WT and  $\beta$ 2 W98A mice (n=4-5) are shown. Relative *Prkab1* (AMPK  $\beta$ 1) gene expression (G) in WT and  $\beta$ 1 W100A liver (n=3-4) and relative *Prkab2* (AMPK  $\beta$ 2) gene expression (H) in WT and  $\beta$ 2 W98A gastrocnemius muscle (n=4-6) are shown. Quantified ratios of phosphorylated (I) AMPK T172, (J) ACC S79 and (K) GS S641 from fed and fasted WT and  $\beta$ 1 W100A liver (n=4-7), and phosphorylated (L) AMPK T172, (M) ACC S79 and (N) GS S641 from WT and  $\beta$ 2 W98A gastrocnemius muscle (n=5-7) are shown. Data are represented as mean  $\pm$  SEM; \* $P$  < 0.05; \*\* $P$  < 0.01.
